# Supplementary material for: A dual-role electrolyte additive for simultaneous polysulfide shuttle inhibition and redox mediation in sulfur batteries
Source: Royal Society of Chemistry journal article supplement (doi:10.1039/d1ta03425a), 2021-01-01
Supplement: d1ta03425a1.pdf [file d1ta03425a1.pdf]

# Supplementary Information

## Dual-role electrolyte additive for simultaneous polysulfide shuttle inhibition and redox mediation in sulfur batteries

Ayda Rafie <sup>a</sup>, Rahul Pai <sup>a</sup>, and Vibha Kalra <sup>a,\*</sup>

<sup>a</sup> Chemical and Biological Engineering, Drexel University, Philadelphia-19104, USA

\*Corresponding author, Email: [vk99@drexel.edu](mailto:vk99@drexel.edu)

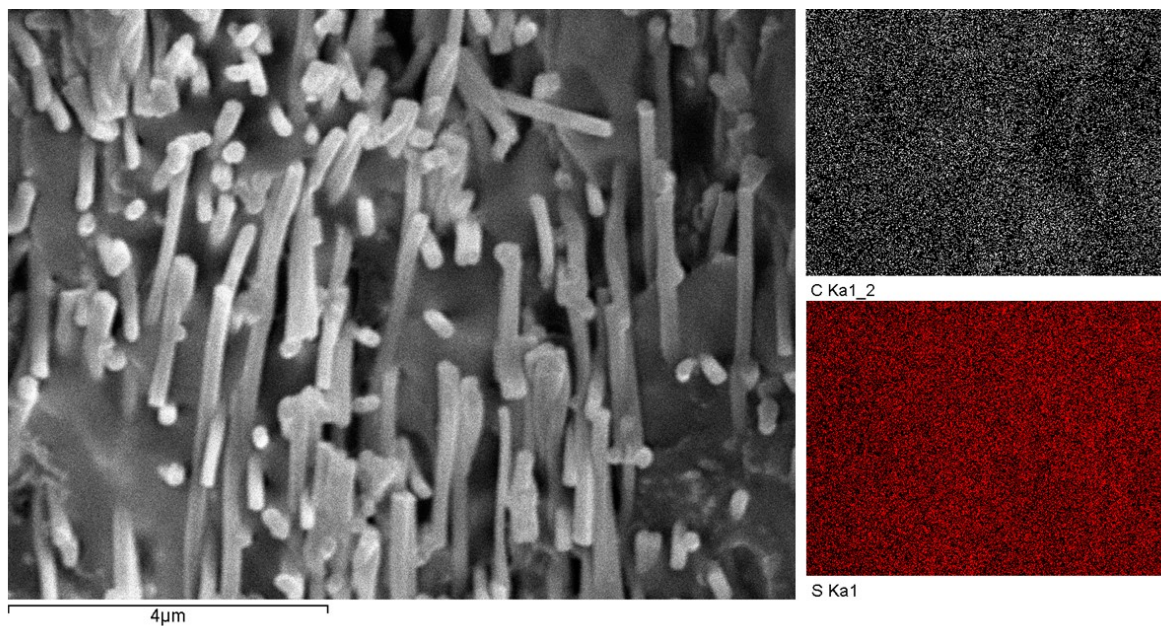

1

2

3 **Figure S1.** Cross section SEM and elemental mapping for SCNF cathode, showing sulfur  
4 distribution throughout the CNFs

5

6

7

8

9

10

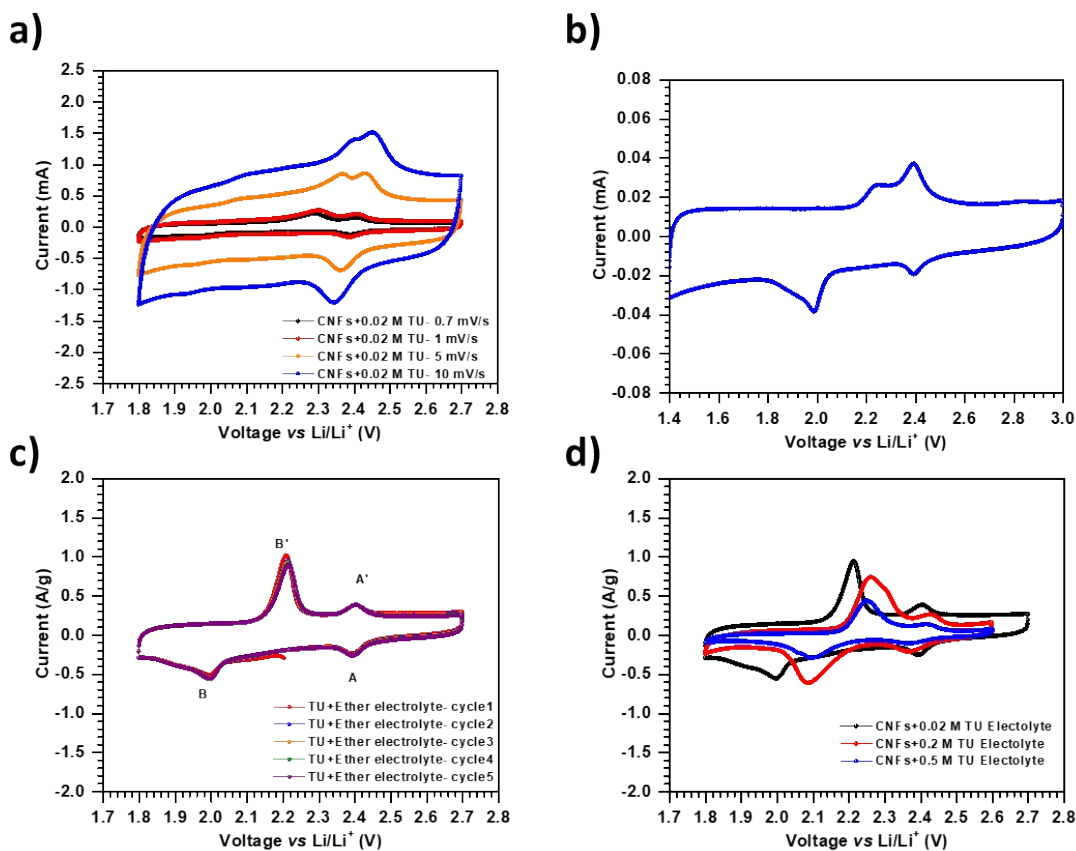

1

2 **Figure S2.** Cyclic voltammetry results of Li-S batteries when using SCNFs as cathode where a)  
 3 0.02 M TU additive added to electrolyte at different scan rates up to 10 mV/s, and b) same coin  
 4 cell from part was used over an extended voltage range between 1.4 to 3.0 V at a scan rate of 0.1  
 5 mV/s, c) 0.02 M TU was added to electrolyte and cycled for 5 cycles and current is adjusted based  
 6 on the weight of TU, and d) 0.02 M, 0.2 M and 0.5 M TU were added to ether electrolyte, and  
 7 current is adjusted based on the weight of TU

8

9

10

11

12

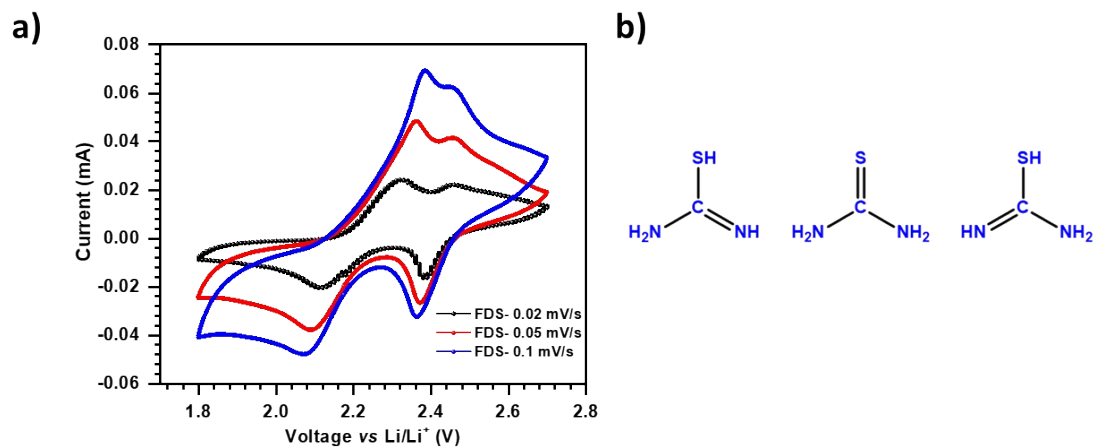

1

2 **Figure S3.** a) Cyclic voltammetry results of Li-S batteries with FDS-based cathodes and ether-  
 3 based electrolyte (without TU additive), and b) Different TU mesomers

4

5

6

7

8

9

10

11

12

13

14

15

16

17

18

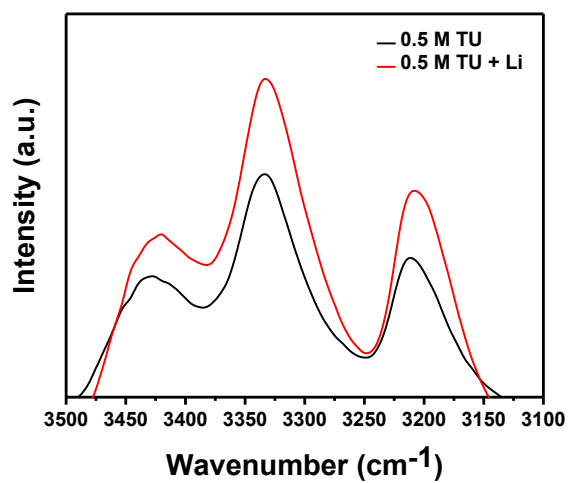

1

2 **Figure S4.** FTR spectra of the TU added electrolyte before and after exposure to Li metal, this  
3 figure confirms that the N-H peaks of the TU additive remains unchanged after exposure to Li  
4 metal, therefore TU is not lithiated.

5

6

7

8

9

10

11

12

13

14

15

16

17

1 Theoretical capacity calculation for TU: To calculate the contribution of TU to the capacity  
2 reported in our work, we have used the following equation:

3  $Q_{theoretical} = nF$

4 Where, n is the number of charge carrier. Here assumed to be 1, and F is the Faraday constant.

5 Using this equation, the theoretical capacity of TU is calculated to be 26.80 Ah/mol<sub>TU</sub>. Based on

6 the molarity of TU used, 0.02 M, 0.2M, or 0.5 M, and the amount of electrolyte used in the cells

7 (~20 μL/mg<sub>S</sub>), we calculated the theoretical capacity contribution from thiourea and adjusted it to

8 the weight of active sulfur material used in the cells.

9

10

11

12

13

14

15

16

17

18

19

20

21

22

23

1

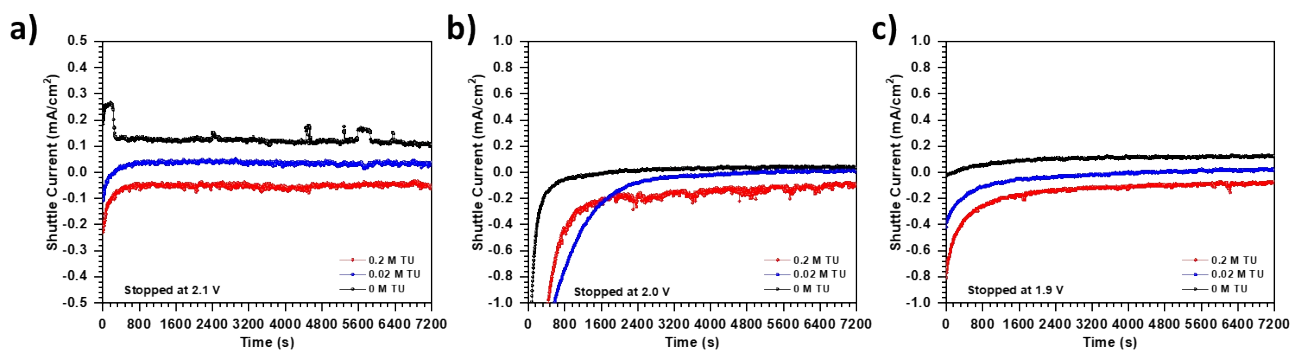

2

3 **Figure S5.** Steady-state shuttle current measurements of Li-S batteries in ether-based electrolyte  
4 (black line), and in presence of 0.02M (blue line) and 0.2 M TU (red line) additive when the battery  
5 is stopped at a) 2.1 V, b) 2.0 V, and c) 1.9 V

6

7

8

9

10

11

12

13

14

15

16

17

18

19

1

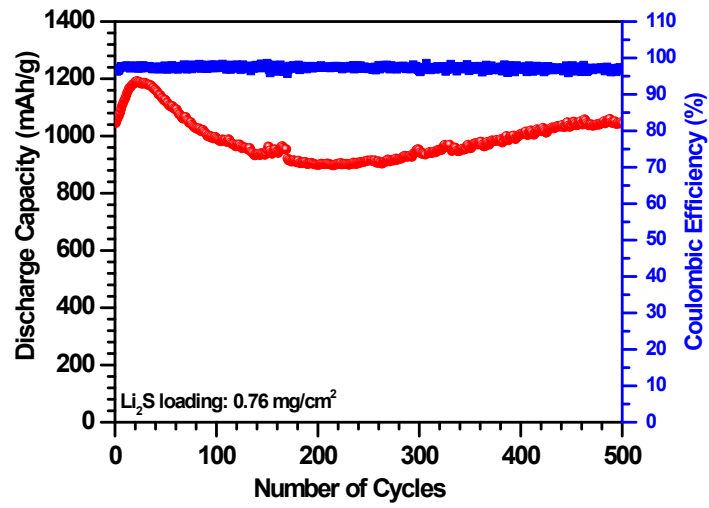

2

3 **Figure S6.** Cyclic result of Li metal-free coin cell with  $\text{Li}_2\text{S}/\text{CNFs}$  as cathode, and commercial  
4 graphite anode, with 0.2 M TU added to the ether electrolyte

5

6

7

8

9

10

11

12

13

14

15

16

17



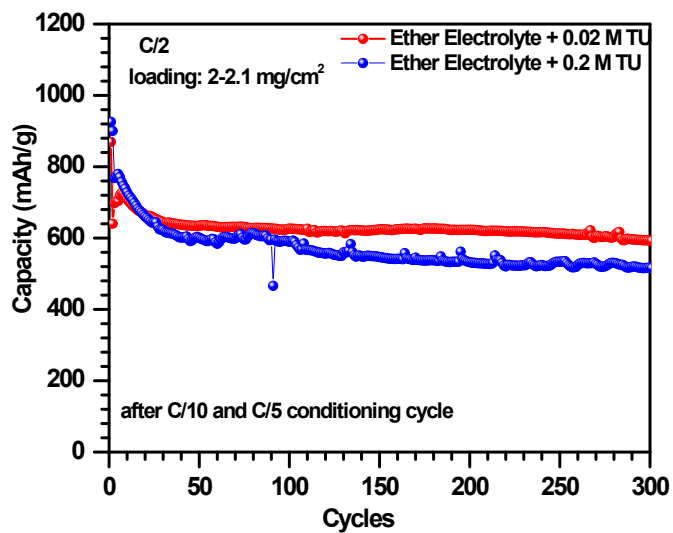

1

2 **Figure S7.** Long-term cycling of Li-S battery with sulfur loading of 2-2.1 mg/cm<sup>2</sup> and 0.01 and  
 3 0.2 M TU added to the reference electrolyte at C/2 rate

4

5

6

7

8

9

10

11

12

13

14

15

16

17

1 **Table S1.** A summary of recent studies on electrolyte additives for Li-S batteries

| Additive                                                                      | Role                                                         | Cycling results                                                                                                                                | Coulombic efficiency       | Reference |
|-------------------------------------------------------------------------------|--------------------------------------------------------------|------------------------------------------------------------------------------------------------------------------------------------------------|----------------------------|-----------|
| biphenyl-4,4'-dithiol (BPD)                                                   | complex formation with polysulfides                          | 575 mAh/g at C/10 after 300 cycles                                                                                                             | 93 ± 3%                    | [1]       |
| hexafluorobenzene (HFB)                                                       | Li <sub>2</sub> S/ Li <sub>2</sub> S <sub>2</sub> activation | ~ 700 mA/g after 100 cycles                                                                                                                    | -                          | [2]       |
| 1,1,2,2-tetrafluoroethyl-2,2,3,3-tetrafluoropropyl ether (TTE)                | formation of a protective layer on sulfur-based cathode      | 772 mAh/g after 300 cycles                                                                                                                     | -                          | [3]       |
| lithium bromide (LiBr)                                                        | formation of a protective layer on sulfur-based cathode      | 870 mAh/g after 200 cycles at C/5                                                                                                              | close to 100%              | [4]       |
| pyrrole (Py)                                                                  | formation of a protective layer on sulfur-based cathode      | 607.3 mAh/g after 300 cycles at 1C                                                                                                             | -                          | [5]       |
| Carbon disulfide (CS <sub>2</sub> )                                           | formation of a protective layer on anode and cathode         | 561 mAh/g after 300 cycles at C/2                                                                                                              | >99%                       | [6]       |
| dithiothreitol (DTT)                                                          | accelerate the conversion from LiPSs to Li <sub>2</sub> S    | 471 mAh/g after 500 cycles                                                                                                                     | 98.5                       | [7]       |
| nickel chloride dimethoxyethane adduct, NiCl <sub>2</sub> .DME, denote NiDME) | accelerates the redox reactions homogeneously                | 784 mAh/g after 500 cycles at 1C                                                                                                               | -                          | [8]       |
| N-aryl-substituted benzo[ghi]peryleneimide (BPI)                              | redox mediator                                               | ~500 mAh/g after 100 cycles at C/2                                                                                                             | ~ 90%                      | [9]       |
| Thiourea (TU)                                                                 | dual role as redox mediator and shuttle inhibitor            | ~690 mAh/g after 700 cycles at C/2 (sulfur cathode- Li metal anode)<br>~1007 mAh/g after 400 cycles (Li <sub>2</sub> S cathode-graphite anode) | >97% throughout 700 cycles | This work |

2

## 1 References:

- 2 1. Wu, H.-L., et al., *Thiol-based electrolyte additives for high-performance lithium-sulfur*  
3 *batteries*. Nano Energy, 2017. **32**: p. 50-58.
- 4 2. Cao, J., et al., *Tackling the Capacity Fading Issue of Li-S Battery by a Functional*  
5 *Additive—Hexafluorobenzene*. ACS Applied Energy Materials, 2020. **3**(4): p. 3198-3204.
- 6 3. Qian, F., et al., *Partially fluorinated ether as an electrolyte additive to modify electrode*  
7 *surface and suppress dissolution of polysulfides in Li-S batteries*. Electrochemical Energy  
8 Technology, 2018. **4**(1): p. 39-46.
- 9 4. Wu, F., et al., *Toward in-situ protected sulfur cathodes by using lithium bromide and pre-*  
10 *charge*. Nano Energy, 2017. **40**: p. 170-179.
- 11 5. Yang, W., et al., *Pyrrole as a promising electrolyte additive to trap polysulfides for lithium-*  
12 *sulfur batteries*. Journal of Power Sources, 2017. **348**: p. 175-182.
- 13 6. Gu, S., et al., *Carbon disulfide cosolvent electrolytes for high-performance lithium sulfur*  
14 *batteries*. ACS applied materials & interfaces, 2016. **8**(50): p. 34379-34386.
- 15 7. Liu, M., et al., *Dithiothreitol as a promising electrolyte additive to suppress the “shuttle*  
16 *effect” by slicing the disulfide bonds of polysulfides in lithium-sulfur batteries*. Journal of  
17 Power Sources, 2019. **424**: p. 254-260.
- 18 8. Luo, C., et al., *An organic nickel salt-based electrolyte additive boosts homogeneous*  
19 *catalysis for lithium-sulfur batteries*. Energy Storage Materials, 2020. **33**: p. 290-297.
- 20 9. Gerber, L.C., et al., *Three-dimensional growth of Li<sub>2</sub>S in lithium-sulfur batteries promoted*  
21 *by a redox mediator*. Nano letters, 2016. **16**(1): p. 549-554.
- 22
